# Supplementary material for: Indirect Predictors of Visceral Adipose Tissue in Women with Polycystic Ovary Syndrome: A Comparison of Methods
Source: MDPI journal article supplement (doi:10.3390/nu13082494), 2021-07-22
Supplement: s1 [file s1]

# Indirect Predictors of Visceral Adipose Tissue in Women with Polycystic Ovary Syndrome: A Comparison of Methods

Małgorzata Kałużna <sup>1,\*</sup>, Magdalena Czapka-Matyasik <sup>2</sup>, Aleksandra Bykowska-Derda <sup>2</sup>, Jerzy Moczko <sup>3</sup>,  
Marek Ruchala <sup>1</sup> and Katarzyna Ziemnicka <sup>1</sup>

**Table S1.** Limits of detection of assessed hormones (electrochemiluminescence (ECLIA), Cobas 6000 equipment, Roche Diagnostics, Switzerland)

| Hormone          | Limit of detection |
|------------------|--------------------|
| AMH (pmol/l)     | 0.214              |
| DHEAS (µg/dl)    | 0.100              |
| E2 (pg/ml)       | 5                  |
| FSH (mIU/ml)     | 0.100              |
| Insulin (µIU/ml) | 0.2                |
| LH (mIU/ml)      | 0.100              |
| SHBG (nmol/l)    | 0.350              |
| T (nmol/l)       | 0.087              |

AMH - *Anti-Müllerian hormone*; DHEAS - *dehydroepiandrosterone sulfate*; E2 - *estradiol*; FSH - *follicle-stimulating hormone*; LH - *luteinizing hormone*; SHBG - *sex hormone binding globulin*; T - *total testosterone*.

**Table S2.** Comparison between study (PCOS) and control (CON) samples age groups (median  $\pm$  interquartile range [IQR] or percentage).

| variable                    | PCOS <sub>18-30</sub><br>n=122 | PCOS <sub>30-40</sub><br>n=32 | P value<br>PCOS <sub>18-30</sub> /<br>PCOS <sub>30-40</sub> | CON <sub>18-30</sub><br>n=49 | CON <sub>30-40</sub><br>n=19 | P value<br>CON <sub>18-30</sub> /<br>CON <sub>30-40</sub> | P value<br>PCOS/<br>CON <sub>18-30</sub> | P value<br>PCOS/<br>CON <sub>30-40</sub> |
|-----------------------------|--------------------------------|-------------------------------|-------------------------------------------------------------|------------------------------|------------------------------|-----------------------------------------------------------|------------------------------------------|------------------------------------------|
| Age (yrs)                   | 23.8 $\pm$ 5.1                 | 32.4 $\pm$ 4.6                | ***                                                         | 23.3 $\pm$ 2.7               | 33.2 $\pm$ 3.9               | ***                                                       | NS                                       | NS                                       |
| weight<br>(kg)              | 65.00 $\pm$ 20.00              | 71.50 $\pm$ 20.50             | NS                                                          | 62.50 $\pm$ 12.50            | 77.00 $\pm$ 10.00            | **                                                        | NS                                       | NS                                       |
| BMI<br>(kg/m <sup>2</sup> ) | 23.49 $\pm$ 7.44               | 24.87 $\pm$ 7.84              | NS                                                          | 22.01 $\pm$ 4.25             | 28.71 $\pm$ 6.06             | *                                                         | NS                                       | NS                                       |
| WC (cm)                     | 77.00 $\pm$ 19.00              | 84.00 $\pm$ 15.00             | NS                                                          | 72.00 $\pm$ 12.00            | 84.50 $\pm$ 14.00            | **                                                        | NS                                       | NS                                       |
| WHR (-)                     | 0.88 $\pm$ 0.10                | 0.91 $\pm$ 0.12               | NS                                                          | 0.87 $\pm$ 0.09              | 0.92 $\pm$ 0.07              | *                                                         | NS                                       | NS                                       |
| WHtR (-)                    | 0.46 $\pm$ 0.11                | 0.50 $\pm$ 0.13               | NS                                                          | 0.43 $\pm$ 0.07              | 0.50 $\pm$ 0.10              | NS                                                        | NS                                       | NS                                       |
| WHT.5R (-<br>)              | 0.59 $\pm$ 0.15                | 0.65 $\pm$ 0.14               | NS                                                          | 0.56 $\pm$ 0.09              | 0.65 $\pm$ 0.11              | **                                                        | NS                                       | NS                                       |
| A/G ratio<br>(-)            | 0.35 $\pm$ 0.21                | 0.35 $\pm$ 0.23               | NS                                                          | 0.32 $\pm$ 0.17              | 0.41 $\pm$ 0.20              | NS                                                        | NS                                       | NS                                       |
| VAT mass<br>(g)             | 251.43 $\pm$<br>521.73         | 496.96 $\pm$ 736.70           | NS                                                          | 174.76 $\pm$<br>287.00       | 675.94 $\pm$ 426.13          | ***                                                       | NS                                       | NS                                       |
| TBF (%)                     | 0.35 $\pm$ 0.12                | 0.36 $\pm$ 0.11               | NS                                                          | 0.33 $\pm$ 0.12              | 0.37 $\pm$ 0.10              | NS                                                        | NS                                       | NS                                       |
| FMI<br>(kg/m <sup>2</sup> ) | 8.06 $\pm$ 4.44                | 8.99 $\pm$ 5.24               | NS                                                          | 7.55 $\pm$ 3.50              | 10.63 $\pm$ 4.84             | NS                                                        | NS                                       | NS                                       |
| LAP (-)                     | 13.95 $\pm$ 25.68              | 23.32 $\pm$ 47.25             | NS                                                          | 12.00 $\pm$ 9.06             | 29.95 $\pm$ 38.48            | NS                                                        | NS                                       | NS                                       |

|                    |                |                |     |                |                |    |    |    |
|--------------------|----------------|----------------|-----|----------------|----------------|----|----|----|
| VAI (-)            | 0.81 ± 0.85    | 1.07 ± 1.68    | NS  | 0.91 ± 0.65    | 1.32 ± 1.17    | NS | NS | NS |
| SBP<br>(mmHg)      | 120.00 ± 19.00 | 122.00 ± 21.00 | NS  | 121.00 ± 22.00 | 125.00 ± 18.00 | NS | NS | NS |
| DBP<br>(mmHg)      | 74.00 ± 22.00  | 78.00 ± 8.00   | NS  | 76.00 ± 14.00  | 76.00 ± 19.00  | NS | NS | NS |
| Glucose<br>(mg/dL) | 88.00 ± 8.00   | 94.00 ± 8.50   | *** | 87.00 ± 11.00  | 89.50 ± 6.00   | NS | NS | NS |
| Insulin<br>(μU/ml) | 9.06 ± 6.78    | 9.75 ± 8.50    | NS  | 9.38 ± 3.78    | 10.50 ± 7.41   | NS | NS | NS |
| HOMA-IR            | 1.96 ± 1.68    | 2.20 ± 2.21    | NS  | 1.92 ± 0.96    | 2.04 ± 1.78    | NS | NS | NS |
| TC<br>(mg/dL)      | 176.00 ± 38.00 | 186.50 ± 55.00 | NS  | 162.00 ± 42.00 | 175.50 ± 51.00 | NS | NS | NS |
| TG<br>(mg/dL)      | 67.00 ± 46.00  | 90.00 ± 84.00  | NS  | 68.00 ± 48.00  | 97.00 ± 74.00  | NS | NS | NS |
| HDL-C<br>(mg/dL)   | 63.00 ± 22.00  | 62.00 ± 17.00  | NS  | 67.00 ± 27.00  | 57.50 ± 18.00  | NS | NS | NS |
| LDL-C<br>(mg/dL)   | 94.90 ± 37.40  | 99.40 ± 52.20  | NS  | 78.30 ± 29.30  | 101.65 ± 32.20 | NS | NS | NS |
| TSH<br>(μU/mL)     | 2.10 ± 1.25    | 1.73 ± 1.37    | NS  | 2.76 ± 1.81    | 2.30 ± 1.39    | NS | NS | NS |
| FSH<br>(mIU/mL)    | 5.80 ± 2.40    | 6.35 ± 2.50    | NS  | 5.60 ± 4.60    | 5.50 ± 2.00    | NS | NS | NS |
| LH<br>(mIU/mL)     | 8.40 ± 8.40    | 9.60 ± 8.70    | NS  | 6.80 ± 6.80    | 6.85 ± 2.30    | NS | NS | NS |

|                  |                    |                 |    |                    |                 |    |     |     |
|------------------|--------------------|-----------------|----|--------------------|-----------------|----|-----|-----|
| E2<br>(pg/mL)    | 42.00 ± 43.00      | 43.00 ± 30.00   | NS | 67.50 ± 65.00      | 68.00 ± 56.00   | NS | NS  | NS  |
| T (nmol/L)       | 1.60 ± 1.10        | 1.65 ± 0.90     | NS | 1.30 ± 0.90        | 1.05 ± 1.00     | NS | *** | *** |
| DHEAS<br>(µg/dL) | 321.00 ±<br>167.00 | 266.00 ± 166.00 | NS | 263.00 ±<br>167.00 | 275.00 ± 141.00 | NS | NS  | NS  |
| SHBG<br>(nmol/L) | 54.30 ± 32.90      | 55.45 ± 61.30   | NS | 55.00 ± 45.10      | 54.90 ± 20.20   | NS | NS  | NS  |
| FTI (%)          | 3.21 ± 3.05        | 2.99 ± 3.91     | NS | 2.33 ± 2.49        | 2.53 ± 2.39     | NS | NS  | NS  |
| AMH<br>(pmol/L)  | 53.11 ± 28.35      | 63.10 ± 41.55   | NS | 27.74 ± 16.50      | 14.55 ± 16.38   | NS | *** | *** |

Data were presented as median ± interquartile range (IQR) or percentage. AMH - Anti-Müllerian hormone; BMI - body mass index; CON - control subjects; DBP - diastolic blood pressure; DHEAS - dehydroepiandrosterone sulfate; E2 - estradiol; FPG - fasting plasma glucose; FSH - follicle-stimulating hormone; FTI - free testosterone index; LH - luteinising hormone; HDL-C - high-density lipoprotein cholesterol; HOMA-IR - homeostasis model assessment for insulin resistance index; LAP - lipid accumulation product; LDL-C - low-density lipoprotein cholesterol; PCOS - polycystic ovary syndrome patients; SBP - systolic blood pressure; SHBG - sex hormone-binding globulin; T - total testosterone; TC - total cholesterol; TG - triglycerides; VAI - visceral adiposity index; WC - waist circumference; WHtR - waist-to-height ratio; \*\*\* for  $p < 0.001$ , \*\* for  $p < 0.01$ , \* for  $p < 0.05$ , NS for not statistically significant.

**Table S3.** Statistical significance of differences between areas under the curves (AUCs) for visceral adiposity indices in PCOS women (*p* value).

| variable              | BMI | WC  | WHR | WHtR | WHT.5R | A/G ratio | TBF | FMI | LAP | VAI |
|-----------------------|-----|-----|-----|------|--------|-----------|-----|-----|-----|-----|
| PCOS <sup>18-30</sup> |     |     |     |      |        |           |     |     |     |     |
| BMI                   | -   | NS  | **  | NS   | *      | **        | **  | NS  | NS  | NS  |
| WC                    | NS  | -   | *** | NS   | NS     | ***       | *** | **  | NS  | **  |
| WHR                   | **  | *** | -   | ***  | ***    | NS        | NS  | NS  | *** | NS  |
| WHtR                  | NS  | NS  | *** | -    | NS     | ***       | *** | **  | NS  | **  |
| WHT.5R                | *   | NS  | *** | NS   |        | ***       | *** | **  | NS  | **  |
| A/G ratio             | **  | *** | NS  | ***  | ***    | -         | NS  | **  | *** | NS  |
| TBF                   | **  | *** | NS  | ***  | ***    | NS        | -   | **  | *** | NS  |
| FMI                   | NS  | **  | NS  | **   | **     | **        | **  | -   | *   | NS  |
| LAP                   | NS  | NS  | *** | NS   | NS     | ***       | *** | *   | -   | *** |
| VAI                   | NS  | **  | NS  | **   | **     | NS        | NS  | NS  | *** | -   |
| PCOS <sup>30-40</sup> |     |     |     |      |        |           |     |     |     |     |
| BMI                   | -   | NS  | **  | NS   | NS     | NS        | NS  | NS  | NS  | NS  |
| WC                    | NS  | -   | **  | NS   | NS     | **        | *   | NS  | NS  | NS  |
| WHR                   | **  | **  | -   | **   | **     | NS        | NS  | *   | **  | *   |
| WHtR                  | NS  | NS  | **  | -    | NS     | ***       | *   | NS  | NS  | NS  |
| WHT.5R                | NS  | NS  | **  | NS   | -      | **        | *   | NS  | NS  | NS  |

|           |    |    |    |     |    |    |    |    |    |    |
|-----------|----|----|----|-----|----|----|----|----|----|----|
| A/G ratio | NS | ** | NS | *** | ** | -  | NS | NS | *  | NS |
| TBF       | NS | *  | NS | *   | *  | NS | -  | *  | NS | NS |
| FMI       | NS | NS | *  | NS  | NS | NS | *  | -  | NS | NS |
| LAP       | NS | NS | ** | NS  | NS | *  | NS | NS | -  | NS |
| VAI       | NS | NS | *  | NS  | NS | NS | NS | NS | NS | -  |

A/G ratio – android-to-gynoid ratio; BMI - body mass index; CON - control subjects; FMI - fat mass index, LAP - lipid accumulation product; PCOS - polycystic ovary syndrome patients; TBF - total body fat percentage, VAI - visceral adiposity index; VAT - visceral adipose tissue mass; WC - waist circumference; WHR - waist-to-hip ratio; WHtR - waist-to-height ratio. \*\*\* for  $p < 0.001$ , \*\* for  $p < 0.01$ , \* for  $p < 0.05$ , ns for not statistically significant.

**Table S4.** Statistical significance of differences between areas under the curves (AUCs) for selected visceral adiposity indices in CON women ( $p$  value).

| variable             | BMI   | WC    | WHR   | WHtR  | WHT.5<br>R | A/G<br>ratio | TBF | FMI  | LAP  | VAI |
|----------------------|-------|-------|-------|-------|------------|--------------|-----|------|------|-----|
| CON <sup>18-30</sup> |       |       |       |       |            |              |     |      |      |     |
| BMI                  | -     | NS    | 0.003 | NS    | 0.01       | NS           | NS  | NS   | NS   | NS  |
| WC                   | NS    | -     | 0.002 | NS    | NS         | NS           | NS  | NS   | NS   | NS  |
| WHR                  | 0.003 | 0.002 | -     | 0.014 | 0.004      | NS           | NS  | 0.03 | 0.04 | NS  |
| WHtR                 | NS    | NS    | 0.014 | -     | NS         | NS           | NS  | NS   | NS   | NS  |
| WHT.5<br>R           | 0.01  | NS    | 0.004 | NS    | -          | NS           | NS  | NS   | NS   | NS  |

|                      |        |        |        |       |        |        |        |        |        |        |
|----------------------|--------|--------|--------|-------|--------|--------|--------|--------|--------|--------|
| A/G ratio            | NS     | NS     | NS     | NS    | NS     | -      | NS     | NS     | NS     | NS     |
| TBF                  | NS     | NS     | NS     | NS    | NS     | NS     | -      | NS     | NS     | NS     |
| FMI                  | NS     | NS     | 0.03   | NS    | NS     | NS     | NS     | -      | NS     | NS     |
| LAP                  | NS     | NS     | 0.04   | NS    | NS     | NS     | NS     | NS     | -      | NS     |
| VAI                  | NS     | NS     | NS     | NS    | NS     | NS     | NS     | NS     | NS     | -      |
| CON <sup>30-40</sup> |        |        |        |       |        |        |        |        |        |        |
| BMI                  | -      | <0.001 | <0.001 | 0.002 | <0.001 | <0.001 | 0.002  | NS     | <0.001 | <0.001 |
| WC                   | <0.001 | -      | <0.001 | NS    | NS     | NS     | NS     | NS     | 0.013  | 0.03   |
| WHR                  | <0.001 | <0.001 | -      | NS    | 0.001  | NS     | NS     | NS     | NS     | NS     |
| WHtR                 | 0.002  | NS     | NS     | -     | NS     | NS     | NS     | NS     | NS     | 0.002  |
| WHT.5R               | <0.001 | NS     | 0.001  | NS    | -      | NS     | NS     | 0.006  | 0.008  | 0.03   |
| A/G ratio            | <0.001 | NS     | NS     | NS    | NS     | -      | NS     | <0.001 | NS     | NS     |
| TBF                  | 0.002  | NS     | NS     | NS    | NS     | NS     | -      | <0.001 | NS     | NS     |
| FMI                  | NS     | NS     | 0.008  | NS    | 0.006  | <0.001 | <0.001 | -      | 0.03   | 0.02   |
| LAP                  | <0.001 | 0.013  | NS     | NS    | 0.008  | NS     | NS     | 0.03   | -      | NS     |
| VAI                  | NS     | 0.03   | NS     | 0.002 | 0.03   | NS     | NS     | NS     | NS     | -      |

A/G ratio – android-to-gynoid ratio; BMI - body mass index; CON - control subjects; FMI - fat mass index, LAP - lipid accumulation product; PCOS - polycystic ovary syndrome patients; TBF - total body fat percentage, VAI - visceral adiposity index; VAT - visceral adipose tissue mass; WC - waist circumference; WHR - waist-to-hip ratio; WHtR - waist-to-height ratio.
